# Supplementary material
Source: PubMed Central journal article supplement (PMC3579240)

**Supplementary Figure 1.** Receiver operating characteristic curves comparing classification performance of renaissance counting (RC) using the EBin test, dual random effects likelihood (DUAL REL) and fixed effects likelihood (FEL) methods in identifying sites under positive selection. The curves plot true and false positive rates as functions of varying test-statistics. Likelihood ratio P-values, Bayes factors and EBin P-values were used for FEL (blue line), DUAL REL (red line) and RC (black line) respectively.

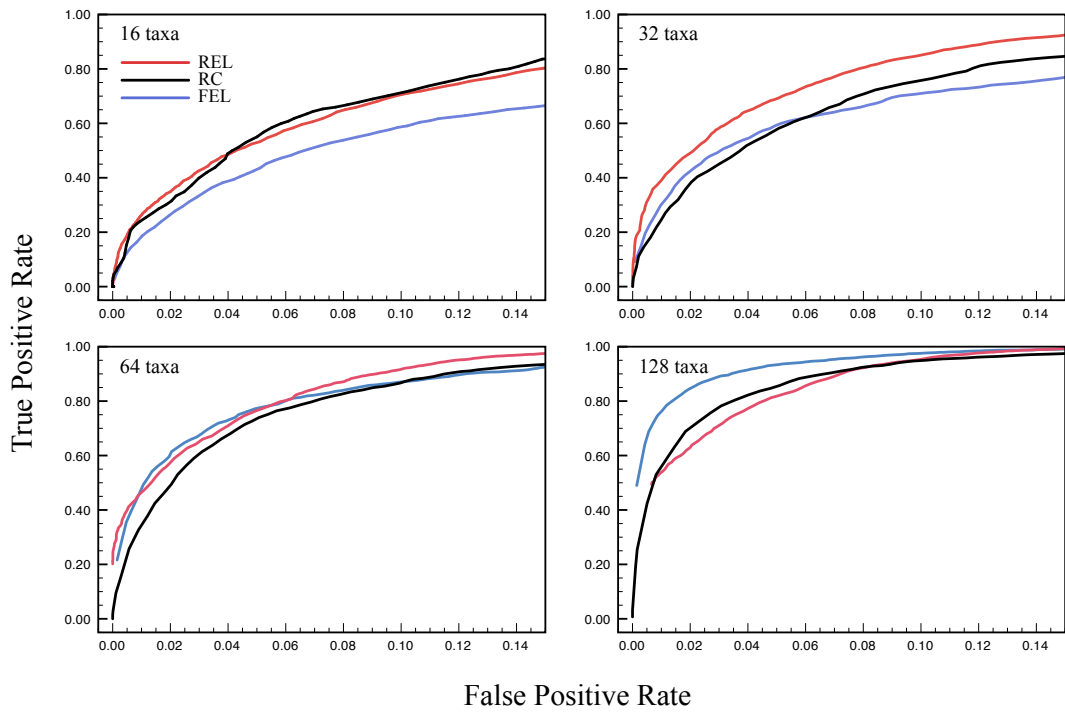

Supplement: supp_bts580_Supplementary_Figure_1.pdf [file supp_bts580_Supplementary_Figure_1.pdf]
