# Supplementary material
Source: PubMed Central journal article supplement (PMC3579240)

**Supplementary Figure 2.** Scatter plot of the site-specific  $\ln(d_N/d_S)$  estimates for dual random effects likelihood (Y) against renaissance counting (X). The horizontal error bars represent the credible intervals for the renaissance counting estimates.

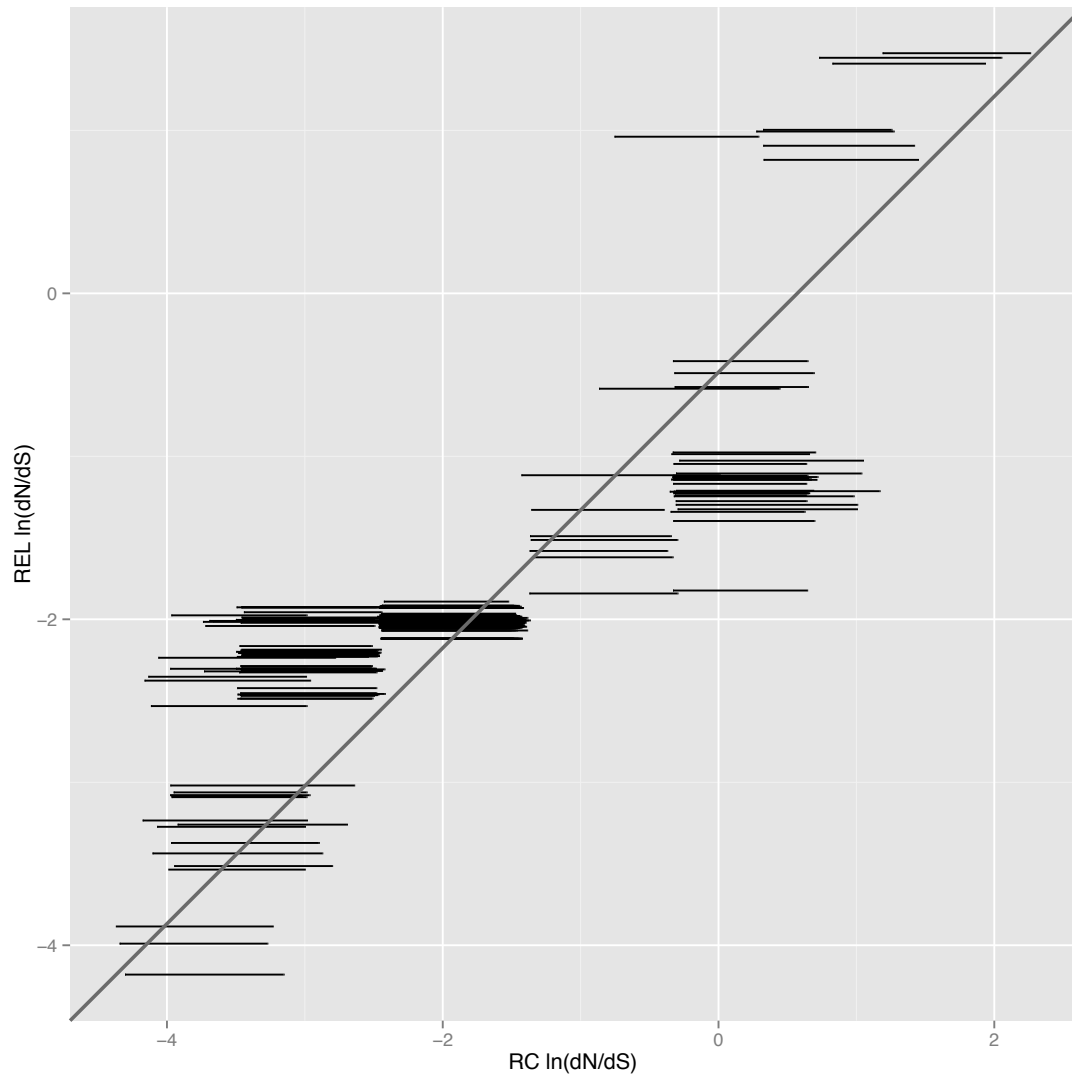

Supplement: supp_bts580_Supplementary_Figure_2.pdf [file supp_bts580_Supplementary_Figure_2.pdf]
