# Supplementary material
Source: PubMed Central journal article supplement (PMC3579240)
Supplement: supp_bts580_Supplementary_Table_1.pdf [file supp_bts580_Supplementary_Table_1.pdf]

**Supplementary Table 1.** P-values (extended binomial) and posterior quantiles (CI coverage) for a renaissance counting false positive rate of 0.1.

| <b>Taxa</b> | <b>EBin P-value</b> | <b>posterior quantile</b> |
|-------------|---------------------|---------------------------|
| <b>16</b>   | 0.50                | 0.86                      |
| <b>32</b>   | 0.36                | 0.94                      |
| <b>64</b>   | 0.31                | 0.90                      |
| <b>128</b>  | 0.26                | 0.93                      |
